# Supplementary material for: Evaluation of next generation emission measurement technologies under repeatable test protocols
Source: Oxford University Press journal article supplement (doi:10.1525/elementa.426), 2020-01-01
Supplement: elementa-8-426-s2.xlsx [file elementa-8-426-s2.xlsx]

## Sheet: Title
Supplementary Material
Evaluation of next generation emission measurement technologies under repeatable test protocols
Clay S. Bell*, Daniel Zimmerle, Timothy Vaughn
Colorado State University, Energy Institute, Fort Collins, CO, 80524
Corresponding author: clay.bell@colostate.edu

## Sheet: Fields
TestType	Testing Protocol: "Continuous Monitoring" or "Survey"
Difficulty	Complexity level of test: A = Single emission source operating at steady emission rate, B = Multiple emission sources, limited to one per equipment unit, operating at steady emission rates, C = Multiple emission sources, potentially on the same equipment unit, including steady and intermittent emission rates
Deployment	Solution deployment mode: Handheld, Mobile, or Continuous Monitor
Test_ID	Unique identifier for the test
true_emission_num	Unique identifier for each emission source in the test
true_pad	Pad which emission source was located on
true_group	Equipment group which emission point was located on
true_equip	Equipment unit which emission point was located on
true_avg_methane_rate	Average metered emission rate during experiment in (scfh CH4)
rptd_emission_num	Unique identifier for emission source reported in the test
rptd_pad	Pad which emission source was reported on
rptd_group	Equipment group which emission point was reported on
rptd_equip	Equipment unit which emission point was reported on
rptd_avg_methane_rate	Reported emission rate (scfh CH4)
LogicalDetect	Detection interpretation
Distance2D	Calculated distance between actual location and reported location (m)

## Sheet: Data
TestType	Difficulty	Deployment	Test_ID	true_emission_num	true_pad	true_group	true_equip	true_avg_methane_rate	rptd_emission_num	rptd_pad	rptd_group	rptd_equip	rptd_avg_methane_rate	LogicalDetect	Distance2D
Continuous Monitor	A	Continuous Monitor	P4-A1	1	4	4W	4W-3	6.4						NON_DETECT
Continuous Monitor	A	Continuous Monitor	P4-A1	1	4	4W	4W-3	6.6	1	4	4W	4W-1	5.6	GROUP_DETECT	7.1
Continuous Monitor	A	Continuous Monitor	P4-A1	1	4	4W	4W-3	6.6	1	4	4W	4W-1	10	GROUP_DETECT	7.08715
Continuous Monitor	A	Continuous Monitor	P4-A1						1	4	4T	4T-3	18.6	FALSE_POSITIVE
Continuous Monitor	A	Continuous Monitor	P4-A1						2	4	4T	4T-1	6	FALSE_POSITIVE
Continuous Monitor	A	Continuous Monitor	P4-A2	1	4	4T	4T-2	6	1	4	4T	4T-3	14.5	GROUP_DETECT	7.4
Continuous Monitor	A	Continuous Monitor	P4-A2	1	4	4T	4T-2	5.8	1	4	4T	4T-1	5.7	GROUP_DETECT	5
Continuous Monitor	A	Continuous Monitor	P4-A2	1	4	4T	4T-2	5.8	2	4	4T	4T-3	5	GROUP_DETECT	4.95486
Continuous Monitor	A	Continuous Monitor	P4-A2						1	4	4W	4W-2	30	FALSE_POSITIVE
Continuous Monitor	A	Continuous Monitor	P4-A3	1	4	4W	4W-4	10.9	1	4	4W	4W-5	46.6	GROUP_DETECT	3.8
Continuous Monitor	A	Continuous Monitor	P4-A3	1	4	4W	4W-4	11.2	1	4	4W	4W-3	6.5	GROUP_DETECT	3.6
Continuous Monitor	A	Continuous Monitor	P4-A3	1	4	4W	4W-4	11.2						NON_DETECT
Continuous Monitor	A	Continuous Monitor	P4-A3						2	4	4S	4S-2	1.2	FALSE_POSITIVE
Continuous Monitor	A	Continuous Monitor	P4-A3						1	4	4W	4W-4	13	FALSE_POSITIVE
Continuous Monitor	A	Continuous Monitor	P4-A3						2	4	4S	4S-2	10	FALSE_POSITIVE
Continuous Monitor	A	Continuous Monitor	P4-A3						3	4	4T	4T-2	8	FALSE_POSITIVE
Continuous Monitor	A	Continuous Monitor	P4-A5	1	4	4S	4S-3	7.1						NON_DETECT
Continuous Monitor	A	Continuous Monitor	P4-A5	1	4	4S	4S-3	7.2	1	4	4S	4S-3	8.4	EQUIPMENT_DETECT	0.7
Continuous Monitor	A	Continuous Monitor	P4-A5	1	4	4S	4S-3	7.2	2	4	4S	4S-3	20	EQUIPMENT_DETECT	0.931075
Continuous Monitor	A	Continuous Monitor	P4-A5						1	4	4W	4W-4	42.2	FALSE_POSITIVE
Continuous Monitor	A	Continuous Monitor	P4-A5						2	4	4T	4T-2	12.8	FALSE_POSITIVE
Continuous Monitor	A	Continuous Monitor	P4-A5						1	4	4W	4W-2	14.5	FALSE_POSITIVE
Continuous Monitor	A	Continuous Monitor	P4-A5						3	4	4T	4T-2	12	FALSE_POSITIVE
Continuous Monitor	A	Continuous Monitor	P4-A6	1	4	4S	4S-3	4.6	2	4	4S	4S-4	28.7	GROUP_DETECT	5.9
Continuous Monitor	A	Continuous Monitor	P4-A6	1	4	4S	4S-3	4.7	1	4	4S	4S-2	7.8	GROUP_DETECT	3.9
Continuous Monitor	A	Continuous Monitor	P4-A6	1	4	4S	4S-3	4.7	1	4	4S	4S-1	16	GROUP_DETECT	6.98851
Continuous Monitor	A	Continuous Monitor	P4-A6						1	4	4W	4W-1	16.9	FALSE_POSITIVE
Continuous Monitor	A	Continuous Monitor	P4-A6						3	4	4S	4S-1	16.6	FALSE_POSITIVE
Continuous Monitor	A	Continuous Monitor	P4-A6						4	4	4W	4W-5	48.5	FALSE_POSITIVE
Continuous Monitor	A	Continuous Monitor	P4-A6						2	4	4T	4T-1	8	FALSE_POSITIVE
Continuous Monitor	A	Continuous Monitor	P4-A8	1	4	4T	4T-3	5.4	1	4	4T	4T-3	9.4	EQUIPMENT_DETECT	4.5
Continuous Monitor	A	Continuous Monitor	P4-A8	1	4	4T	4T-3	5.1	1	4	4T	4T-1	5.5	GROUP_DETECT	9.8
Continuous Monitor	A	Continuous Monitor	P4-A8	1	4	4T	4T-3	5.1						NON_DETECT
Continuous Monitor	A	Continuous Monitor	P4-A8						1	4	4W	4W-2	9	FALSE_POSITIVE
Continuous Monitor	B	Continuous Monitor	P4-B1	1	4	4S	4S-2	7.2	1	4	4S	4S-4	15	GROUP_DETECT	9.1
Continuous Monitor	B	Continuous Monitor	P4-B1	1	4	4S	4S-2	7.3	2	4	4S	4S-4	4	GROUP_DETECT	7.7
Continuous Monitor	B	Continuous Monitor	P4-B1	1	4	4S	4S-2	7.3	2	4	4S	4S-1	8	GROUP_DETECT	4.06783
Continuous Monitor	B	Continuous Monitor	P4-B1	2	4	4W	4W-2	0						NON_DETECT
Continuous Monitor	B	Continuous Monitor	P4-B1	2	4	4W	4W-2	4.4						NON_DETECT
Continuous Monitor	B	Continuous Monitor	P4-B1	2	4	4W	4W-2	4.4	1	4	4W	4W-2	11	EQUIPMENT_DETECT	0.408351
Continuous Monitor	B	Continuous Monitor	P4-B1	3	4	4W	4W-3	1.4	3	4	4W	4W-4	9.7	GROUP_DETECT	4.3
Continuous Monitor	B	Continuous Monitor	P4-B1	3	4	4W	4W-3	1.5	1	4	4W	4W-3	1.8	EQUIPMENT_DETECT	1
Continuous Monitor	B	Continuous Monitor	P4-B1	3	4	4W	4W-3	1.5						NON_DETECT
Continuous Monitor	B	Continuous Monitor	P4-B1						2	4	4T	4T-3	12.7	FALSE_POSITIVE
Continuous Monitor	B	Continuous Monitor	P4-B1						3	4	4T	4T-3	1.2	FALSE_POSITIVE
Continuous Monitor	B	Continuous Monitor	P4-B1						3	4	4T	4T-3	8	FALSE_POSITIVE
Continuous Monitor	B	Continuous Monitor	P4-B2	1	4	4T	4T-3	9.2	3	4	4T	4T-3	84.8	EQUIPMENT_DETECT	2.2
Continuous Monitor	B	Continuous Monitor	P4-B2	1	4	4T	4T-3	9.8	3	4	4T	4T-1	14.7	GROUP_DETECT	9.9
Continuous Monitor	B	Continuous Monitor	P4-B2	1	4	4T	4T-3	9.8						NON_DETECT
Continuous Monitor	B	Continuous Monitor	P4-B2	2	4	4W	4W-0	16.3	2	4	4W	4W-3	35.4	GROUP_DETECT	4.6
Continuous Monitor	B	Continuous Monitor	P4-B2	2	4	4W	4W-0	18.1	1	4	4W	4W-3	13.2	GROUP_DETECT	4.3
Continuous Monitor	B	Continuous Monitor	P4-B2	2	4	4W	4W-0	18.1	1	4	4W	4W-5	38	GROUP_DETECT	7.86754
Continuous Monitor	B	Continuous Monitor	P4-B2						1	4	4W	4W-5	3.4	FALSE_POSITIVE
Continuous Monitor	B	Continuous Monitor	P4-B2						2	4	4S	4S-3	2.5	FALSE_POSITIVE
Continuous Monitor	B	Continuous Monitor	P4-B3	1	4	4S	4S-2	8						NON_DETECT
Continuous Monitor	B	Continuous Monitor	P4-B3	1	4	4S	4S-2	8.6						NON_DETECT
Continuous Monitor	B	Continuous Monitor	P4-B3	1	4	4S	4S-2	8.6						NON_DETECT
Continuous Monitor	B	Continuous Monitor	P4-B3	2	4	4S	4S-4	12.5	2	4	4S	4S-4	37.2	EQUIPMENT_DETECT	1.3
Continuous Monitor	B	Continuous Monitor	P4-B3	2	4	4S	4S-4	13.8	2	4	4S	4S-3	36.4	GROUP_DETECT	3.5
Continuous Monitor	B	Continuous Monitor	P4-B3	2	4	4S	4S-4	13.8	1	4	4S	4S-3	30	GROUP_DETECT	3.56963
Continuous Monitor	B	Continuous Monitor	P4-B3						1	4	4W	4W-1	19.6	FALSE_POSITIVE
Continuous Monitor	B	Continuous Monitor	P4-B3						1	4	4W	4W-4	3.3	FALSE_POSITIVE
Continuous Monitor	B	Continuous Monitor	P4-B3						3	4	4T	4T-3	4.6	FALSE_POSITIVE
Continuous Monitor	B	Continuous Monitor	P4-B4	1	4	4S	4S-3	3.5	1	4	4S	4S-2	8.2	GROUP_DETECT	2.5
Continuous Monitor	B	Continuous Monitor	P4-B4	1	4	4S	4S-3	3.5	2	4	4S	4S-4	4.4	GROUP_DETECT	4.8
Continuous Monitor	B	Continuous Monitor	P4-B4	1	4	4S	4S-3	3.5	2	4	4S	4S-1	10	GROUP_DETECT	6.98851
Continuous Monitor	B	Continuous Monitor	P4-B4	2	4	4W	4W-1	3.4	2	4	4W	4W-3	28.1	GROUP_DETECT	6.4
Continuous Monitor	B	Continuous Monitor	P4-B4	2	4	4W	4W-1	3.5	1	4	4W	4W-1	0.9	EQUIPMENT_DETECT	0.1
Continuous Monitor	B	Continuous Monitor	P4-B4	2	4	4W	4W-1	3.5	1	4	4W	4W-1	39	EQUIPMENT_DETECT	0.169859
Continuous Monitor	B	Continuous Monitor	P4-B4						3	4	4T	4T-2	3	FALSE_POSITIVE
Continuous Monitor	B	Continuous Monitor	P4-B5	1	4	4S	4S-2	1.2						NON_DETECT
Continuous Monitor	B	Continuous Monitor	P4-B5	1	4	4S	4S-2	1.2	1	4	4S	4S-3	1.4	GROUP_DETECT	4.2
Continuous Monitor	B	Continuous Monitor	P4-B5	1	4	4S	4S-2	1.2	2	4	4S	4S-3	24	GROUP_DETECT	4.06433
Continuous Monitor	B	Continuous Monitor	P4-B5	2	4	4T	4T-1	6	1	4	4T	4T-1	1	EQUIPMENT_DETECT	1.4
Continuous Monitor	B	Continuous Monitor	P4-B5	2	4	4T	4T-1	5.8	2	4	4T	4T-1	3.1	EQUIPMENT_DETECT	1.7
Continuous Monitor	B	Continuous Monitor	P4-B5	2	4	4T	4T-1	5.8	3	4	4T	4T-2	24	GROUP_DETECT	4.85767
Continuous Monitor	B	Continuous Monitor	P4-B5	3	4	4W	4W-1	3.4						NON_DETECT
Continuous Monitor	B	Continuous Monitor	P4-B5	3	4	4W	4W-1	3.5						NON_DETECT
Continuous Monitor	B	Continuous Monitor	P4-B5	3	4	4W	4W-1	3.5	1	4	4W	4W-3	10	GROUP_DETECT	7.53468
Continuous Monitor	B	Continuous Monitor	P4-B5						2	4	4T	4T-3	9.7	FALSE_POSITIVE
Continuous Monitor	B	Continuous Monitor	P4-B6	1	4	4S	4S-3	3.5						NON_DETECT
Continuous Monitor	B	Continuous Monitor	P4-B6	1	4	4S	4S-3	3.7	1	4	4S	4S-3	3.4	EQUIPMENT_DETECT	0.7
Continuous Monitor	B	Continuous Monitor	P4-B6	1	4	4S	4S-3	3.7						NON_DETECT
Continuous Monitor	B	Continuous Monitor	P4-B6	2	4	4W	4W-4	1.4	1	4	4W	4W-1	1.3	GROUP_DETECT	9.6
Continuous Monitor	B	Continuous Monitor	P4-B6	2	4	4W	4W-4	1.5						NON_DETECT
Continuous Monitor	B	Continuous Monitor	P4-B6	2	4	4W	4W-4	1.5						NON_DETECT
Continuous Monitor	B	Continuous Monitor	P4-B6						2	4	4T	4T-1	8.8	FALSE_POSITIVE
Continuous Monitor	B	Continuous Monitor	P4-B6						1	4	4C	4C-1	35	FALSE_POSITIVE
Continuous Monitor	C	Continuous Monitor	P4-C1	1	4	4S	4S-3	5.7	1	4	4S	4S-1	30.6	GROUP_DETECT	6.8
Continuous Monitor	C	Continuous Monitor	P4-C1	1	4	4S	4S-3	5.5	2	4	4S	4S-3	12.2	EQUIPMENT_DETECT	2.2
Continuous Monitor	C	Continuous Monitor	P4-C1	1	4	4S	4S-3	5.5						NON_DETECT
Continuous Monitor	C	Continuous Monitor	P4-C1	2	4	4S	4S-4	0						NON_DETECT
Continuous Monitor	C	Continuous Monitor	P4-C1	2	4	4S	4S-4	0						NON_DETECT
Continuous Monitor	C	Continuous Monitor	P4-C1	2	4	4S	4S-4	0						NON_DETECT
Continuous Monitor	C	Continuous Monitor	P4-C1	3	4	4W	4W-0	9.3	2	4	4W	4W-1	2.1	GROUP_DETECT	8
Continuous Monitor	C	Continuous Monitor	P4-C1	3	4	4W	4W-0	9.7						NON_DETECT
Continuous Monitor	C	Continuous Monitor	P4-C1	3	4	4W	4W-0	9.7						NON_DETECT
Continuous Monitor	C	Continuous Monitor	P4-C1	4	4	4W	4W-4	0.1						NON_DETECT
Continuous Monitor	C	Continuous Monitor	P4-C1	4	4	4W	4W-4	0.1						NON_DETECT
Continuous Monitor	C	Continuous Monitor	P4-C1	4	4	4W	4W-4	0.1						NON_DETECT
Continuous Monitor	C	Continuous Monitor	P4-C1	5	4	4W	4W-4	3.1						NON_DETECT
Continuous Monitor	C	Continuous Monitor	P4-C1	5	4	4W	4W-4	3.3	1	4	4W	4W-5	5.1	GROUP_DETECT	3.6
Continuous Monitor	C	Continuous Monitor	P4-C1	5	4	4W	4W-4	3.3						NON_DETECT
Continuous Monitor	C	Continuous Monitor	P4-C1						1	4	4W	4W-4	7	FALSE_POSITIVE
Continuous Monitor	C	Continuous Monitor	P4-C2	1	4	4S	4S-2	0.1						NON_DETECT
Continuous Monitor	C	Continuous Monitor	P4-C2	1	4	4S	4S-2	0.1						NON_DETECT
Continuous Monitor	C	Continuous Monitor	P4-C2	1	4	4S	4S-2	0.1						NON_DETECT
Continuous Monitor	C	Continuous Monitor	P4-C2	2	4	4S	4S-4	0.2	2	4	4S	4S-4	5.5	EQUIPMENT_DETECT	1.4
Continuous Monitor	C	Continuous Monitor	P4-C2	2	4	4S	4S-4	0.2						NON_DETECT
Continuous Monitor	C	Continuous Monitor	P4-C2	2	4	4S	4S-4	0.2	1	4	4S	4S-3	22.5	GROUP_DETECT	3.56963
Continuous Monitor	C	Continuous Monitor	P4-C2	3	4	4T	4T-1	1.9						NON_DETECT
Continuous Monitor	C	Continuous Monitor	P4-C2	3	4	4T	4T-1	7.1	2	4	4T	4T-1	1.2	EQUIPMENT_DETECT	1.7
Continuous Monitor	C	Continuous Monitor	P4-C2	3	4	4T	4T-1	7.1	2	4	4T	4T-1	11	EQUIPMENT_DETECT	1.82221
Continuous Monitor	C	Continuous Monitor	P4-C2	4	4	4T	4T-3	1.9						NON_DETECT
Continuous Monitor	C	Continuous Monitor	P4-C2	4	4	4T	4T-3	8.6						NON_DETECT
Continuous Monitor	C	Continuous Monitor	P4-C2	4	4	4T	4T-3	8.6						NON_DETECT
Continuous Monitor	C	Continuous Monitor	P4-C2						1	4	4W	4W-5	0.1	FALSE_POSITIVE
Continuous Monitor	C	Continuous Monitor	P4-C2						1	4	4W	4W-5	0.9	FALSE_POSITIVE
Continuous Monitor	C	Continuous Monitor	P4-C3	1	4	4S	4S-2	4.8						NON_DETECT
Continuous Monitor	C	Continuous Monitor	P4-C3	1	4	4S	4S-2	4.9	2	4	4S	4S-3	6.9	GROUP_DETECT	4.2
Continuous Monitor	C	Continuous Monitor	P4-C3	1	4	4S	4S-2	4.9	2	4	4S	4S-3	8.5	GROUP_DETECT	4.06433
Continuous Monitor	C	Continuous Monitor	P4-C3	2	4	4T	4T-3	6.8	1	4	4T	4T-3	24.1	EQUIPMENT_DETECT	2.7
Continuous Monitor	C	Continuous Monitor	P4-C3	2	4	4T	4T-3	5.9	3	4	4T	4T-3	10.7	EQUIPMENT_DETECT	0.3
Continuous Monitor	C	Continuous Monitor	P4-C3	2	4	4T	4T-3	5.9						NON_DETECT
Continuous Monitor	C	Continuous Monitor	P4-C3	3	4	4T	4T-3	2.5						NON_DETECT
Continuous Monitor	C	Continuous Monitor	P4-C3	3	4	4T	4T-3	2.4						NON_DETECT
Continuous Monitor	C	Continuous Monitor	P4-C3	3	4	4T	4T-3	2.4	3	4	4T	4T-3	10	EQUIPMENT_DETECT	0.479845
Continuous Monitor	C	Continuous Monitor	P4-C3	4	4	4W	4W-3	4.9						NON_DETECT
Continuous Monitor	C	Continuous Monitor	P4-C3	4	4	4W	4W-3	5.1	1	4	4W	4W-3	4.8	EQUIPMENT_DETECT	1
Continuous Monitor	C	Continuous Monitor	P4-C3	4	4	4W	4W-3	5.1	1	4	4W	4W-2	12	GROUP_DETECT	3.49599
Survey	A	Handheld	P1-A1	1	1	1W	1W-1	19.6	1	1	1W	1W-1		EQUIPMENT_DETECT	0
Survey	A	Handheld	P1-A1	1	1	1W	1W-1	15.2	1	1	1W	1W-1		EQUIPMENT_DETECT	0
Survey	A	Mobile	P1-A1	1	1	1W	1W-1	19.6	1	1	1W	1W-1		EQUIPMENT_DETECT	0.5
Survey	A	Mobile	P1-A1	1	1	1W	1W-1	15.2	1	1	1W	1W-1		EQUIPMENT_DETECT	0.5
Survey	A	Handheld	P1-A1	1	1	1W	1W-1	19.6	1	1	1W	1W-1		EQUIPMENT_DETECT	1.1
Survey	A	Handheld	P1-A1	1	1	1W	1W-1	15.2	1	1	1W	1W-1		EQUIPMENT_DETECT	1.3
Survey	A	Mobile	P1-A1	1	1	1W	1W-1	17.6	1	1	1W	1W-1	11.1	EQUIPMENT_DETECT	0.6
Survey	A	Mobile	P1-A1	1	1	1W	1W-1	17	1	1	1W	1W-1	14.6	EQUIPMENT_DETECT	0.278131
Survey	A	Mobile	P1-A1	1	1	1W	1W-1	15.3	1	1	1W	1W-1	15.4	EQUIPMENT_DETECT	0.2
Survey	A	Mobile	P1-A1	1	1	1W	1W-1	16						GROUP_DETECT
Survey	A	Mobile	P1-A1						1	1	1S	1S-1	26	FALSE_POSITIVE
Survey	A	Handheld	P1-A6	1	1	1S	1S-1	13.2	1	1	1S	1S-1		EQUIPMENT_DETECT	0.2
Survey	A	Handheld	P1-A6	1	1	1S	1S-1	13.2	1	1	1S	1S-1		EQUIPMENT_DETECT	0.2
Survey	A	Mobile	P1-A6	1	1	1S	1S-1	13.2	1	1	1S	1S-1		EQUIPMENT_DETECT	0.2
Survey	A	Mobile	P1-A6	1	1	1S	1S-1	13.2	1	1	1S	1S-1		EQUIPMENT_DETECT	0.2
Survey	A	Handheld	P1-A6	1	1	1S	1S-1	13.2	1	1	1S	1S-1		EQUIPMENT_DETECT	2.5
Survey	A	Handheld	P1-A6	1	1	1S	1S-1	13.2	1	1	1S	1S-1		EQUIPMENT_DETECT	3.1
Survey	A	Mobile	P1-A6	1	1	1S	1S-1	14	1	1	1S	1S-1	4.5	EQUIPMENT_DETECT	2.4
Survey	A	Mobile	P1-A6	1	1	1S	1S-1	12.7	1	1	1S	1S-1	0.8	EQUIPMENT_DETECT	0.119685
Survey	A	Mobile	P1-A6	1	1	1S	1S-1	11.9	1	1	1S	1S-1	17.8	EQUIPMENT_DETECT	0.2
Survey	A	Mobile	P1-A6	1	1	1S	1S-1	11	1	1	1S	1S-1	19	EQUIPMENT_DETECT	0.2
Survey	A	Handheld	P2-A2	1	2	2W	2W-1	12.3	1	2	2W	2W-1		EQUIPMENT_DETECT	0.2
Survey	A	Handheld	P2-A2	1	2	2W	2W-1	10.7	1	2	2W	2W-1		EQUIPMENT_DETECT	0.2
Survey	A	Mobile	P2-A2	1	2	2W	2W-1	12.3	1	2	2W	2W-1		EQUIPMENT_DETECT	0.2
Survey	A	Mobile	P2-A2	1	2	2W	2W-1	10.7	1	2	2W	2W-1		EQUIPMENT_DETECT	0.2
Survey	A	Handheld	P2-A2	1	2	2W	2W-1	12.3	1	2	2W	2W-1		EQUIPMENT_DETECT	3.3
Survey	A	Handheld	P2-A2	1	2	2W	2W-1	10.7	1	2	2W	2W-1		EQUIPMENT_DETECT	3.2
Survey	A	Mobile	P2-A2	1	2	2W	2W-1	9.7	1	2	2W	2W-1	11.1	EQUIPMENT_DETECT	0.5
Survey	A	Mobile	P2-A2	1	2	2W	2W-1	10	1	2	2W	2W-1	3.2	EQUIPMENT_DETECT	0.392436
Survey	A	Mobile	P2-A2	1	2	2W	2W-1	9.2	1	2	2W	2W-1	7.5	EQUIPMENT_DETECT	0.2
Survey	A	Mobile	P2-A2	1	2	2W	2W-1	10.1	1	2	2W	2W-1	7	EQUIPMENT_DETECT	0.6
Survey	A	Handheld	P3-A3	1	3	3T	3T-1	30.4	1	3	3T	3T-1		EQUIPMENT_DETECT	0.2
Survey	A	Handheld	P3-A3	1	3	3T	3T-1	25.8	1	3	3T	3T-1		EQUIPMENT_DETECT	0.2
Survey	A	Mobile	P3-A3	1	3	3T	3T-1	30.4	1	3	3T	3T-1		EQUIPMENT_DETECT	0.3
Survey	A	Mobile	P3-A3	1	3	3T	3T-1	25.8	1	3	3T	3T-1		EQUIPMENT_DETECT	0.3
Survey	A	Handheld	P3-A3	1	3	3T	3T-1	30.4	1	3	3T	3T-1		EQUIPMENT_DETECT	2
Survey	A	Handheld	P3-A3	1	3	3T	3T-1	25.8	1	3	3T	3T-1		EQUIPMENT_DETECT	2.2
Survey	A	Mobile	P3-A3	1	3	3T	3T-1	25.5	1	3	3T	3T-1	21.6	EQUIPMENT_DETECT	1.3
Survey	A	Mobile	P3-A3	1	3	3T	3T-1	25.4	1	3	3T	3T-1	18.1	EQUIPMENT_DETECT	0.2034
Survey	A	Mobile	P3-A3	1	3	3T	3T-1	25.9	1	3	3T	3T-1	34.8	EQUIPMENT_DETECT	0.2
Survey	A	Mobile	P3-A3	1	3	3T	3T-1	26	1	3	3T	3T-1	41	EQUIPMENT_DETECT	0.4
Survey	A	Handheld	P4-A4	1	4	4S	4S-4	5.9	1	4	4S	4S-4		EQUIPMENT_DETECT	0.2
Survey	A	Handheld	P4-A4	1	4	4S	4S-4	4.8	1	4	4S	4S-4		EQUIPMENT_DETECT	0.2
Survey	A	Mobile	P4-A4	1	4	4S	4S-4	5.9	1	4	4S	4S-4		EQUIPMENT_DETECT	0.2
Survey	A	Mobile	P4-A4	1	4	4S	4S-4	4.8	1	4	4S	4S-4		EQUIPMENT_DETECT	0.2
Survey	A	Handheld	P4-A4	1	4	4S	4S-4	5.9	1	4	4S	4S-4		EQUIPMENT_DETECT	5.2
Survey	A	Handheld	P4-A4	1	4	4S	4S-4	4.8	2	4	4S	4S-4		EQUIPMENT_DETECT	5.6
Survey	A	Mobile	P4-A4	1	4	4S	4S-4	4.4		4	4N			NON_DETECT
Survey	A	Mobile	P4-A4	1	4	4S	4S-4	4.5	1	4	4S	4S-4	0	EQUIPMENT_DETECT	0.177373
Survey	A	Mobile	P4-A4	1	4	4S	4S-4	4.4	1	4	4S	4S-4	4	EQUIPMENT_DETECT	0.2
Survey	A	Mobile	P4-A4	1	4	4S	4S-4	4.4	1	4	4S	4S-4	4	EQUIPMENT_DETECT	0.8
Survey	A	Handheld	P4-A4						1	4	4T	4T-1		FALSE_POSITIVE
Survey	A	Handheld	P5-A5	1	5	5W	5W-1	3.9	1	5	5W	5W-1		EQUIPMENT_DETECT	0.1
Survey	A	Handheld	P5-A5	1	5	5W	5W-1	16.1	1	5	5W	5W-1		EQUIPMENT_DETECT	0.1
Survey	A	Mobile	P5-A5	1	5	5W	5W-1	3.9	1	5	5W	5W-1		EQUIPMENT_DETECT	0.1
Survey	A	Mobile	P5-A5	1	5	5W	5W-1	16.1	1	5	5W	5W-1		EQUIPMENT_DETECT	0.1
Survey	A	Handheld	P5-A5	1	5	5W	5W-1	3.9	1	5	5W	5W-1		EQUIPMENT_DETECT	1.6
Survey	A	Handheld	P5-A5	1	5	5W	5W-1	16.1	1	5	5W	5W-1		EQUIPMENT_DETECT	2.7
Survey	A	Mobile	P5-A5	1	5	5W	5W-1	11.5	1	5	5W	5W-1	15.9	EQUIPMENT_DETECT	1.8
Survey	A	Mobile	P5-A5	1	5	5W	5W-1	11.6	1	5	5W	5W-1	1.3	EQUIPMENT_DETECT	0.0708626
Survey	A	Mobile	P5-A5	1	5	5W	5W-1	11.4	1	5	5W	5W-1	12.8	EQUIPMENT_DETECT	0.3
Survey	A	Mobile	P5-A5	1	5	5W	5W-1	10.9	1	5	5W	5W-1	24	EQUIPMENT_DETECT	0.6
Survey	A	Mobile	P5-A5						2	5	5S	5S-2	0.5	FALSE_POSITIVE
Survey	B	Handheld	P1-B5	1	1	1S	1S-1	8.6	2	1	1S	1S-1		EQUIPMENT_DETECT	0.1
Survey	B	Handheld	P1-B5	1	1	1S	1S-1	7.3	2	1	1S	1S-1		EQUIPMENT_DETECT	0.1
Survey	B	Mobile	P1-B5	1	1	1S	1S-1	8.6	1	1	1S	1S-1		EQUIPMENT_DETECT	0.1
Survey	B	Mobile	P1-B5	1	1	1S	1S-1	7.3	1	1	1S	1S-1		EQUIPMENT_DETECT	0.1
Survey	B	Handheld	P1-B5	1	1	1S	1S-1	8.6						GROUP_DETECT
Survey	B	Handheld	P1-B5	1	1	1S	1S-1	7.3	2	1	1S	1S-1		EQUIPMENT_DETECT	5
Survey	B	Mobile	P1-B5	1	1	1S	1S-1	7.4	2	1	1S	1S-1	15.5	EQUIPMENT_DETECT	3.7
Survey	B	Mobile	P1-B5	1	1	1S	1S-1	6.8						GROUP_DETECT
Survey	B	Mobile	P1-B5	1	1	1S	1S-1	5.5	1	1	1S	1S-1	9.7	EQUIPMENT_DETECT	3.7
Survey	B	Mobile	P1-B5	1	1	1S	1S-1	6.8	1	1	1S	1S-1	7	EQUIPMENT_DETECT	1.2
Survey	B	Handheld	P1-B5	2	1	1W	1W-1	5.8	1	1	1W	1W-1		EQUIPMENT_DETECT	0.1
Survey	B	Handheld	P1-B5	2	1	1W	1W-1	4.6	1	1	1W	1W-1		EQUIPMENT_DETECT	0.1
Survey	B	Mobile	P1-B5	2	1	1W	1W-1	5.8	2	1	1W	1W-1		EQUIPMENT_DETECT	0.4
Survey	B	Mobile	P1-B5	2	1	1W	1W-1	4.6	2	1	1W	1W-1		EQUIPMENT_DETECT	0.4
Survey	B	Handheld	P1-B5	2	1	1W	1W-1	5.8	1	1	1W	1W-1		EQUIPMENT_DETECT	0.6
Survey	B	Handheld	P1-B5	2	1	1W	1W-1	4.6						GROUP_DETECT
Survey	B	Mobile	P1-B5	2	1	1W	1W-1	5.2	1	1	1W	1W-1	17.2	EQUIPMENT_DETECT	1
Survey	B	Mobile	P1-B5	2	1	1W	1W-1	4.6	1	1	1W	1W-1	0.9	EQUIPMENT_DETECT	0.706943
Survey	B	Mobile	P1-B5	2	1	1W	1W-1	3.5	2	1	1W	1W-1	6	EQUIPMENT_DETECT	0.1
Survey	B	Mobile	P1-B5	2	1	1W	1W-1	4.5						GROUP_DETECT
Survey	B	Handheld	P1-B5						2	1	1S	1S-1		FALSE_POSITIVE
Survey	B	Handheld	P1-B5						1	1	1W	1W-1		FALSE_POSITIVE
Survey	B	Handheld	P2-B1	1	2	2S	2S-1	7		2	2N			NON_DETECT
Survey	B	Handheld	P2-B1	1	2	2S	2S-1	7.2	2	2	2S	2S-1		EQUIPMENT_DETECT	0.1
Survey	B	Mobile	P2-B1	1	2	2S	2S-1	7	1	2	2S	2S-1		EQUIPMENT_DETECT	0.1
Survey	B	Mobile	P2-B1	1	2	2S	2S-1	7.2	1	2	2S	2S-1		EQUIPMENT_DETECT	0.1
Survey	B	Handheld	P2-B1	1	2	2S	2S-1	7	2	2	2S	2S-1		EQUIPMENT_DETECT	3.9
Survey	B	Handheld	P2-B1	1	2	2S	2S-1	7.2	1	2	2S	2S-1		EQUIPMENT_DETECT	3.9
Survey	B	Mobile	P2-B1	1	2	2S	2S-1	5.5						GROUP_DETECT
Survey	B	Mobile	P2-B1	1	2	2S	2S-1	5.8	2	2	2S	2S-1	0	EQUIPMENT_DETECT	0.359373
Survey	B	Mobile	P2-B1	1	2	2S	2S-1	5.1	2	2	2S	2S-1	5.4	EQUIPMENT_DETECT	0.1
Survey	B	Mobile	P2-B1	1	2	2S	2S-1	5.7						GROUP_DETECT
Survey	B	Handheld	P2-B1	2	2	2W	2W-1	5.6		2	2N			NON_DETECT
Survey	B	Handheld	P2-B1	2	2	2W	2W-1	5.6	1	2	2W	2W-1		EQUIPMENT_DETECT	0.2
Survey	B	Mobile	P2-B1	2	2	2W	2W-1	5.6	2	2	2W	2W-1		EQUIPMENT_DETECT	0.3
Survey	B	Mobile	P2-B1	2	2	2W	2W-1	5.6	2	2	2W	2W-1		EQUIPMENT_DETECT	0.3
Survey	B	Handheld	P2-B1	2	2	2W	2W-1	5.6	1	2	2W	2W-1		EQUIPMENT_DETECT	3.7
Survey	B	Handheld	P2-B1	2	2	2W	2W-1	5.6	2	2	2W	2W-1		EQUIPMENT_DETECT	3.7
Survey	B	Mobile	P2-B1	2	2	2W	2W-1	4.5	1	2	2W	2W-1	7.5	EQUIPMENT_DETECT	1.5
Survey	B	Mobile	P2-B1	2	2	2W	2W-1	4.6	1	2	2W	2W-1	0	EQUIPMENT_DETECT	0.186556
Survey	B	Mobile	P2-B1	2	2	2W	2W-1	4.1	1	2	2W	2W-1	4.8	EQUIPMENT_DETECT	0.2
Survey	B	Mobile	P2-B1	2	2	2W	2W-1	4.6	1	2	2W	2W-1	9	EQUIPMENT_DETECT	1.4
Survey	B	Handheld	P2-B6	1	2	2T	2T-1	12.6	1	2	2T	2T-1		EQUIPMENT_DETECT	0.3
Survey	B	Handheld	P2-B6	1	2	2T	2T-1	10.7	2	2	2T	2T-1		EQUIPMENT_DETECT	0.3
Survey	B	Mobile	P2-B6	1	2	2T	2T-1	12.6	1	2	2T	2T-1		EQUIPMENT_DETECT	0.2
Survey	B	Mobile	P2-B6	1	2	2T	2T-1	10.7	1	2	2T	2T-1		EQUIPMENT_DETECT	0.2
Survey	B	Handheld	P2-B6	1	2	2T	2T-1	12.6	1	2	2T	2T-1		EQUIPMENT_DETECT	1.7
Survey	B	Handheld	P2-B6	1	2	2T	2T-1	10.7	1	2	2T	2T-1		EQUIPMENT_DETECT	1.3
Survey	B	Mobile	P2-B6	1	2	2T	2T-1	9.8	1	2	2T	2T-1	7.3	EQUIPMENT_DETECT	0.8
Survey	B	Mobile	P2-B6	1	2	2T	2T-1	10	2	2	2T	2T-1	6.5	EQUIPMENT_DETECT	0.339574
Survey	B	Mobile	P2-B6	1	2	2T	2T-1	9	1	2	2T	2T-1	7	EQUIPMENT_DETECT	0.1
Survey	B	Mobile	P2-B6	1	2	2T	2T-1	10.1						GROUP_DETECT
Survey	B	Handheld	P2-B6	2	2	2W	2W-1	3.9	2	2	2W	2W-1		EQUIPMENT_DETECT	0.2
Survey	B	Handheld	P2-B6	2	2	2W	2W-1	3.3	1	2	2W	2W-1		EQUIPMENT_DETECT	0.2
Survey	B	Mobile	P2-B6	2	2	2W	2W-1	3.9						GROUP_DETECT
Survey	B	Mobile	P2-B6	2	2	2W	2W-1	3.3						GROUP_DETECT
Survey	B	Handheld	P2-B6	2	2	2W	2W-1	3.9	2	2	2W	2W-1		EQUIPMENT_DETECT	3.7
Survey	B	Handheld	P2-B6	2	2	2W	2W-1	3.3						GROUP_DETECT
Survey	B	Mobile	P2-B6	2	2	2W	2W-1	3.1						GROUP_DETECT
Survey	B	Mobile	P2-B6	2	2	2W	2W-1	3.2	1	2	2W	2W-1	1	EQUIPMENT_DETECT	0.247099
Survey	B	Mobile	P2-B6	2	2	2W	2W-1	2.9	2	2	2W	2W-1	4	EQUIPMENT_DETECT	0.1
Survey	B	Mobile	P2-B6	2	2	2W	2W-1	3.1	1	2	2W	2W-1	24	EQUIPMENT_DETECT	1.4
Survey	B	Handheld	P3-B2	1	3	3S	3S-2	5.1	1	3	3S	3S-2		EQUIPMENT_DETECT	0.3
Survey	B	Handheld	P3-B2	1	3	3S	3S-2	6	1	3	3S	3S-2		EQUIPMENT_DETECT	0.3
Survey	B	Handheld	P3-B2	1	3	3S	3S-2	7.3	1	3	3S	3S-2		EQUIPMENT_DETECT	0.3
Survey	B	Mobile	P3-B2	1	3	3S	3S-2	5.1	1	3	3S	3S-1		GROUP_DETECT	6.2
Survey	B	Mobile	P3-B2	1	3	3S	3S-2	6	1	3	3S	3S-2		EQUIPMENT_DETECT	0.3
Survey	B	Mobile	P3-B2	1	3	3S	3S-2	7.3	1	3	3S	3S-2		EQUIPMENT_DETECT	0.3
Survey	B	Handheld	P3-B2	1	3	3S	3S-2	5.1	1	3	3S	3S-2		EQUIPMENT_DETECT	3.8
Survey	B	Handheld	P3-B2	1	3	3S	3S-2	6	2	3	3S	3S-2		EQUIPMENT_DETECT	4
Survey	B	Handheld	P3-B2	1	3	3S	3S-2	7.3	1	3	3S	3S-2		EQUIPMENT_DETECT	1.8
Survey	B	Mobile	P3-B2	1	3	3S	3S-2	5	2	3	3S	3S-2	11	EQUIPMENT_DETECT	0.9
Survey	B	Mobile	P3-B2	1	3	3S	3S-2	4.1	1	3	3S	3S-2	10.2	EQUIPMENT_DETECT	0.237035
Survey	B	Mobile	P3-B2	1	3	3S	3S-2	4.6	2	3	3S	3S-2	14.6	EQUIPMENT_DETECT	1.8
Survey	B	Mobile	P3-B2	1	3	3S	3S-2	5.3						NON_DETECT
Survey	B	Handheld	P3-B2	2	3	3T	3T-2	7.8						NON_DETECT
Survey	B	Handheld	P3-B2	2	3	3T	3T-2	8.5						NON_DETECT
Survey	B	Handheld	P3-B2	2	3	3T	3T-2	8.9	2	3	3T	3T-2		EQUIPMENT_DETECT	1.6
Survey	B	Mobile	P3-B2	2	3	3T	3T-2	7.8						NON_DETECT
Survey	B	Mobile	P3-B2	2	3	3T	3T-2	8.5						NON_DETECT
Survey	B	Mobile	P3-B2	2	3	3T	3T-2	8.9						NON_DETECT
Survey	B	Handheld	P3-B2	2	3	3T	3T-2	7.8						NON_DETECT
Survey	B	Handheld	P3-B2	2	3	3T	3T-2	8.5	1	3	3T	3T-2		EQUIPMENT_DETECT	2.8
Survey	B	Handheld	P3-B2	2	3	3T	3T-2	8.9						NON_DETECT
Survey	B	Mobile	P3-B2	2	3	3T	3T-2	8	1	3	3T	3T-2	2.6	EQUIPMENT_DETECT	0.3
Survey	B	Mobile	P3-B2	2	3	3T	3T-2	6.8						NON_DETECT
Survey	B	Mobile	P3-B2	2	3	3T	3T-2	7.8	1	3	3T	3T-2	17.4	EQUIPMENT_DETECT	0.1
Survey	B	Mobile	P3-B2	2	3	3T	3T-2	8.2	1	3	3T	3T-2	28	EQUIPMENT_DETECT	0.2
Survey	B	Mobile	P4-B3	1	4	4S	4S-3	6.85	1	4	4S	4S-3	4.4	EQUIPMENT_DETECT	3.4
Survey	B	Mobile	P4-B3	1	4	4S	4S-3	6.85	1	4	4S	4S-3	0.1	EQUIPMENT_DETECT	230.664
Survey	B	Mobile	P4-B3	1	4	4S	4S-3	6.85	2	4	4S	4S-3	9.8	EQUIPMENT_DETECT	0.9
Survey	B	Mobile	P4-B3	1	4	4S	4S-3	3.4						NON_DETECT
Survey	B	Mobile	P4-B3	2	4	4T	4T-1	11.95	3	4	4T	4T-1	7.7	EQUIPMENT_DETECT	2.4
Survey	B	Mobile	P4-B3	2	4	4T	4T-1	11.95						NON_DETECT
Survey	B	Mobile	P4-B3	2	4	4T	4T-1	11.95	1	4	4T	4T-1	14	EQUIPMENT_DETECT	0.1
Survey	B	Mobile	P4-B3	2	4	4T	4T-1	8.5	1	4	4T	4T-2	10	GROUP_DETECT	5.6
Survey	B	Mobile	P4-B3	3	4	4W	4W-0	9.86	2	4	4W	4W-0	3.2	EQUIPMENT_DETECT	3
Survey	B	Mobile	P4-B3	3	4	4W	4W-0	9.86						NON_DETECT
Survey	B	Mobile	P4-B3	3	4	4W	4W-0	9.86	3	4	4W	4W-0	5.4	EQUIPMENT_DETECT	1.1
Survey	B	Mobile	P4-B3	3	4	4W	4W-0	10.2						NON_DETECT
Survey	B	Handheld	P5-B4	1	5	5S	5S-1	1.3						NON_DETECT
Survey	B	Handheld	P5-B4	1	5	5S	5S-1	1.3						NON_DETECT
Survey	B	Mobile	P5-B4	1	5	5S	5S-1	1.3	1	5	5S	5S-1		EQUIPMENT_DETECT	0.1
Survey	B	Mobile	P5-B4	1	5	5S	5S-1	1.3	1	5	5S	5S-1		EQUIPMENT_DETECT	0.1
Survey	B	Handheld	P5-B4	1	5	5S	5S-1	1.3	2	5	5S	5S-1		EQUIPMENT_DETECT	4.2
Survey	B	Handheld	P5-B4	1	5	5S	5S-1	1.3	2	5	5S	5S-1		EQUIPMENT_DETECT	2.3
Survey	B	Mobile	P5-B4	1	5	5S	5S-1	3.8	2	5	5S	5S-2	2.2	GROUP_DETECT	2.2
Survey	B	Mobile	P5-B4	1	5	5S	5S-1	1	2	5	5S	5S-1	0.4	EQUIPMENT_DETECT	0.0883369
Survey	B	Mobile	P5-B4	1	5	5S	5S-1	3.9	1	5	5S	5S-1	4.7	EQUIPMENT_DETECT	1.6
Survey	B	Mobile	P5-B4	1	5	5S	5S-1	3.9						NON_DETECT
Survey	B	Handheld	P5-B4	2	5	5S	5S-3	8.2	1	5	5S	5S-3		EQUIPMENT_DETECT	0.1
Survey	B	Handheld	P5-B4	2	5	5S	5S-3	7	2	5	5S	5S-3		EQUIPMENT_DETECT	0.1
Survey	B	Mobile	P5-B4	2	5	5S	5S-3	8.2	2	5	5S	5S-3		EQUIPMENT_DETECT	0.1
Survey	B	Mobile	P5-B4	2	5	5S	5S-3	7	2	5	5S	5S-3		EQUIPMENT_DETECT	0.1
Survey	B	Handheld	P5-B4	2	5	5S	5S-3	8.2	3	5	5S	5S-3		EQUIPMENT_DETECT	3.4
Survey	B	Handheld	P5-B4	2	5	5S	5S-3	7	3	5	5S	5S-3		EQUIPMENT_DETECT	2.4
Survey	B	Mobile	P5-B4	2	5	5S	5S-3	6.3						NON_DETECT
Survey	B	Mobile	P5-B4	2	5	5S	5S-3	6.4						NON_DETECT
Survey	B	Mobile	P5-B4	2	5	5S	5S-3	6.4	2	5	5S	5S-3	6.6	EQUIPMENT_DETECT	0.4
Survey	B	Mobile	P5-B4	2	5	5S	5S-3	6.4						NON_DETECT
Survey	B	Handheld	P5-B4	3	5	5W	5W-2	8.4	2	5	5W	5W-2		EQUIPMENT_DETECT	0.2
Survey	B	Handheld	P5-B4	3	5	5W	5W-2	6	1	5	5W	5W-2		EQUIPMENT_DETECT	0.2
Survey	B	Mobile	P5-B4	3	5	5W	5W-2	8.4	3	5	5W	5W-2		EQUIPMENT_DETECT	0.2
Survey	B	Mobile	P5-B4	3	5	5W	5W-2	6	3	5	5W	5W-2		EQUIPMENT_DETECT	0.2
Survey	B	Handheld	P5-B4	3	5	5W	5W-2	8.4	1	5	5W	5W-2		EQUIPMENT_DETECT	5.6
Survey	B	Handheld	P5-B4	3	5	5W	5W-2	6	1	5	5W	5W-2		EQUIPMENT_DETECT	2.6
Survey	B	Mobile	P5-B4	3	5	5W	5W-2	5.8	1	5	5W	5W-2	4	EQUIPMENT_DETECT	0.6
Survey	B	Mobile	P5-B4	3	5	5W	5W-2	6	1	5	5W	5W-2	0.2	EQUIPMENT_DETECT	21.6361
Survey	B	Mobile	P5-B4	3	5	5W	5W-2	5.6	3	5	5W	5W-2	7.5	EQUIPMENT_DETECT	5.4
Survey	B	Mobile	P5-B4	3	5	5W	5W-2	5.6	1	5	5W	5W-1	15	GROUP_DETECT	4.6
Survey	C	Handheld	P1-C1	1	1	1W	1W-1	5.1	2	1	1W	1W-1		EQUIPMENT_DETECT	0.3
Survey	C	Handheld	P1-C1	1	1	1W	1W-1	4.3	2	1	1W	1W-1		EQUIPMENT_DETECT	0.3
Survey	C	Mobile	P1-C1	1	1	1W	1W-1	5.1	1	1	1W	1W-1		EQUIPMENT_DETECT	0.3
Survey	C	Mobile	P1-C1	1	1	1W	1W-1	4.3	1	1	1W	1W-1		EQUIPMENT_DETECT	0.3
Survey	C	Handheld	P1-C1	1	1	1W	1W-1	5.1	1	1	1W	1W-1		MULTI_DETECT	0.6
Survey	C	Handheld	P1-C1	1	1	1W	1W-1	4.3	1	1	1W	1W-1		MULTI_DETECT	1
Survey	C	Mobile	P1-C1	1	1	1T	1T-1	0.3						GROUP_DETECT
Survey	C	Mobile	P1-C1	1	1	1T	1T-1	0.3	2	1	1T	1T-1	1.7	EQUIPMENT_DETECT	0.421118
Survey	C	Mobile	P1-C1	1	1	1T	1T-1	0.3						GROUP_DETECT
Survey	C	Mobile	P1-C1	1	1	1W	1W-1	2.4	1	1	1W	1W-1	9	MULTI_DETECT	0.5
Survey	C	Handheld	P1-C1	2	1	1W	1W-1	7.8	1	1	1W	1W-1		EQUIPMENT_DETECT	0.3
Survey	C	Handheld	P1-C1	2	1	1W	1W-1	6.5	1	1	1W	1W-1		EQUIPMENT_DETECT	0.3
Survey	C	Mobile	P1-C1	2	1	1W	1W-1	7.8	2	1	1W	1W-1		EQUIPMENT_DETECT	0
Survey	C	Mobile	P1-C1	2	1	1W	1W-1	6.5	2	1	1W	1W-1		EQUIPMENT_DETECT	0
Survey	C	Handheld	P1-C1	2	1	1W	1W-1	7.8	1	1	1W	1W-1		MULTI_DETECT	1
Survey	C	Handheld	P1-C1	2	1	1W	1W-1	6.5	1	1	1W	1W-1		MULTI_DETECT	1.5
Survey	C	Mobile	P1-C1	2	1	1W	1W-1	5.2	1	1	1W	1W-1	12.9	MULTI_DETECT	0
Survey	C	Mobile	P1-C1	2	1	1W	1W-1	3	1	1	1W	1W-1	0.6	MULTI_DETECT	0.389536
Survey	C	Mobile	P1-C1	2	1	1W	1W-1	4.4	1	1	1W	1W-1	16.3	MULTI_DETECT	0.5
Survey	C	Mobile	P1-C1	2	1	1W	1W-1	4.7	1	1	1W	1W-1	9	MULTI_DETECT	0
Survey	C	Mobile	P1-C1	3	1	1W	1W-1	7.7	1	1	1W	1W-1	12.9	MULTI_DETECT	0.5
Survey	C	Mobile	P1-C1	3	1	1W	1W-1	5.2	1	1	1W	1W-1	0.6	MULTI_DETECT	0.799829
Survey	C	Mobile	P1-C1	3	1	1W	1W-1	6.7	1	1	1W	1W-1	16.3	MULTI_DETECT	0.2
Survey	C	Handheld	P3-C2	1	3	3S	3S-1	3.8	1	3	3S	3S-1		EQUIPMENT_DETECT	0.5
Survey	C	Handheld	P3-C2	1	3	3S	3S-1	2.5	1	3	3S	3S-1		EQUIPMENT_DETECT	0.5
Survey	C	Mobile	P3-C2	1	3	3S	3S-1	3.8	1	3	3S	3S-1		EQUIPMENT_DETECT	0.3
Survey	C	Mobile	P3-C2	1	3	3S	3S-1	2.5	1	3	3S	3S-1		EQUIPMENT_DETECT	0.3
Survey	C	Handheld	P3-C2	1	3	3S	3S-1	3.8	1	3	3S	3S-1		EQUIPMENT_DETECT	4.4
Survey	C	Handheld	P3-C2	1	3	3S	3S-1	2.5	1	3	3S	3S-1		EQUIPMENT_DETECT	4.7
Survey	C	Mobile	P3-C2	1	3	3S	3S-1	3.5	1	3	3S	3S-1	3.7	EQUIPMENT_DETECT	0.9
Survey	C	Mobile	P3-C2	1	3	3S	3S-1	2.3	1	3	3S	3S-1	1.2	EQUIPMENT_DETECT	0.603631
Survey	C	Mobile	P3-C2	1	3	3S	3S-1	2.4						NON_DETECT
Survey	C	Mobile	P3-C2	1	3	3S	3S-1	3.7	1	3	3S	3S-1	7	EQUIPMENT_DETECT	2
Survey	C	Mobile	P3-C2	2	3	3S	3S-1	0.5						NON_DETECT
Survey	C	Mobile	P3-C2	2	3	3S	3S-1	0.4	2	3	3S	3S-1	3.7	EQUIPMENT_DETECT	0.207489
Survey	C	Mobile	P3-C2	2	3	3S	3S-1	0.4	1	3	3S	3S-1	10.5	EQUIPMENT_DETECT	1.2
Survey	C	Mobile	P3-C2	3	3	3W	3W-1	0.3						NON_DETECT
Survey	C	Mobile	P3-C2	3	3	3W	3W-1	0.3	3	3	3W	3W-1	2.2	EQUIPMENT_DETECT	0.178437
Survey	C	Mobile	P3-C2	3	3	3W	3W-1	0.3	2	3	3W	3W-1	1.8	EQUIPMENT_DETECT	0.5
Survey	C	Handheld	P3-C2						2	3	3S	3S-1		FALSE_POSITIVE
Survey	C	Handheld	P3-C2						3	3	3W	3W-1		FALSE_POSITIVE
Survey	C	Handheld	P3-C2						2	3	3W	3W-1		FALSE_POSITIVE
Survey	C	Handheld	P3-C2						2	3	3W	3W-3		FALSE_POSITIVE
Survey	C	Handheld	P3-C2						2	3	3W	3W-1		FALSE_POSITIVE
Survey	C	Handheld	P4-C3	1	4	4S	4S-3	1.9	1	4	4S	4S-3		EQUIPMENT_DETECT	0
Survey	C	Handheld	P4-C3	1	4	4S	4S-3	3.9	2	4	4S	4S-3		EQUIPMENT_DETECT	0
Survey	C	Mobile	P4-C3	1	4	4S	4S-3	1.9	1	4	4S	4S-3		EQUIPMENT_DETECT	0
Survey	C	Mobile	P4-C3	1	4	4S	4S-3	3.9	1	4	4S	4S-3		EQUIPMENT_DETECT	0
Survey	C	Handheld	P4-C3	1	4	4S	4S-3	1.9	1	4	4S	4S-3		EQUIPMENT_DETECT	1.4
Survey	C	Handheld	P4-C3	1	4	4S	4S-3	3.9	2	4	4S	4S-3		EQUIPMENT_DETECT	1.7
Survey	C	Mobile	P4-C3	1	4	4S	4S-3	8.7	1	4	4S	4S-3	5.2	EQUIPMENT_DETECT	0.7
Survey	C	Mobile	P4-C3	1	4	4S	4S-3	8.2	3	4	4S	4S-3	11.9	EQUIPMENT_DETECT	0.205025
Survey	C	Mobile	P4-C3	1	4	4S	4S-3	7.9	2	4	4S	4S-3	12.1	EQUIPMENT_DETECT	0
Survey	C	Mobile	P4-C3	1	4	4S	4S-3	2.4	1	4	4S	4S-4	4	GROUP_DETECT	0.7
Survey	C	Handheld	P4-C3	2	4	4W	4W-3	6						NON_DETECT
Survey	C	Handheld	P4-C3	2	4	4W	4W-3	5.3	1	4	4W	4W-3		EQUIPMENT_DETECT	0.2
Survey	C	Mobile	P4-C3	2	4	4W	4W-3	6	2	4	4W	4W-3		EQUIPMENT_DETECT	0.1
Survey	C	Mobile	P4-C3	2	4	4W	4W-3	5.3	2	4	4W	4W-3		EQUIPMENT_DETECT	0.2
Survey	C	Handheld	P4-C3	2	4	4W	4W-3	6	2	4	4W	4W-3		EQUIPMENT_DETECT	4.3
Survey	C	Handheld	P4-C3	2	4	4W	4W-3	5.3	1	4	4W	4W-3		EQUIPMENT_DETECT	1.8
Survey	C	Mobile	P4-C3	2	4	4S	4S-4	0.3						NON_DETECT
Survey	C	Mobile	P4-C3	2	4	4S	4S-4	0.2						NON_DETECT
Survey	C	Mobile	P4-C3	2	4	4S	4S-4	0.2						NON_DETECT
Survey	C	Mobile	P4-C3	2	4	4W	4W-3	5.3						NON_DETECT
Survey	C	Mobile	P4-C3	3	4	4W	4W-3	4.7	2	4	4W	4W-3	2.8	EQUIPMENT_DETECT	0.6
Survey	C	Mobile	P4-C3	3	4	4W	4W-3	4.7	1	4	4W	4W-3	1.2	EQUIPMENT_DETECT	0.356959
Survey	C	Mobile	P4-C3	3	4	4W	4W-3	4.6	1	4	4W	4W-3	4.2	EQUIPMENT_DETECT	0.2
Survey	C	Mobile	P4-C3	4	4	4W	4W-4	0.2						NON_DETECT
Survey	C	Mobile	P4-C3	4	4	4W	4W-4	0.2	2	4	4W	4W-5	3.7	GROUP_DETECT	3.6146
Survey	C	Mobile	P4-C3	4	4	4W	4W-4	0.1						NON_DETECT
